# Supplementary material
Source: PubMed Central journal article supplement (PMC5978473)
Supplement: DS_10.1177_0146621617707509.pdf [file DS_10.1177_0146621617707509.pdf]

## Appendix

These are the similar results that were not reported in the article. You may find the relevant information on the study design in the notes.

Table 1

Recovery Rates and Exposure Balance Indices for the DINA Model (Fixed-length)

| Item selection | Attribute |       |       |       |       |        | Pattern | Exposure balance<br>$\chi^2$ | Number of overused<br>(>0.2) | Number of underused<br>(<0.02) |
|----------------|-----------|-------|-------|-------|-------|--------|---------|------------------------------|------------------------------|--------------------------------|
|                | 1         | 2     | 3     | 4     | 5     | 6      |         |                              |                              |                                |
| PWKL           | 0.999     | 1.000 | 1.000 | 1.000 | 1.000 | 1.000  | 0.999   | 310.470                      | 398                          | 33                             |
| RT             | 0.987     | 0.991 | 0.985 | 0.987 | 0.990 | 0.986  | 0.930   | 1.745                        | 0                            | 0                              |
| RP             | 0.986     | 0.990 | 0.991 | 0.988 | 0.985 | 0.994  | 0.935   | 0.263                        | 0                            | 0                              |
| SDBS           | 0.992     | 0.987 | 0.988 | 0.992 | 0.986 | 0.9863 | 0.931   | 4.542                        | 0                            | 0                              |
| random         | 0.933     | 0.931 | 0.941 | 0.949 | 0.951 | 0.939  | 0.714   | 0.477                        | 0                            | 0                              |

Note1: PWKL = posterior weighed Kullback-Leibler method; RT= restrictive threshold method; RP= restrictive progressive method; SDBS = stratified dynamic binary searching.

Note2: This is a 24-item fixed-length CD-CAT for the DINA model. Item bank and examinees were simulated in the same way as Study II. The tuning parameter was set to be 10 for RT and RP; the number of strata was 6 for SDBS.

Table 2

The Measurement Accuracy and Test Length for the NC\_RUM Model (Variable-length)

|     | Item Selection | Attribute |       |       |       | Pattern | Test Length |        |
|-----|----------------|-----------|-------|-------|-------|---------|-------------|--------|
|     |                | 1         | 2     | 3     | 4     |         | Mean        | SD     |
| 0.7 | PWKL           | 0.943     | 0.948 | 0.949 | 0.900 | 0.806   | 7.20        | 1.845  |
|     | SHTVOR         | 0.903     | 0.926 | 0.934 | 0.920 | 0.736   | 20.28       | 10.083 |
|     | DBS            | 0.924     | 0.924 | 0.911 | 0.931 | 0.730   | 21.57       | 7.490  |
| 0.8 | PWKL           | 0.938     | 0.951 | 0.960 | 0.972 | 0.833   | 8.59        | 2.369  |
|     | SHTVOR         | 0.946     | 0.933 | 0.949 | 0.950 | 0.801   | 23.87       | 10.341 |
|     | DBS            | 0.946     | 0.933 | 0.945 | 0.950 | 0.801   | 24.46       | 7.468  |
| 0.9 | PWKL           | 0.984     | 0.978 | 0.987 | 0.978 | 0.929   | 11.86       | 3.232  |
|     | SHTVOR         | 0.971     | 0.971 | 0.983 | 0.979 | 0.907   | 35.73       | 13.258 |
|     | DBS            | 0.977     | 0.971 | 0.975 | 0.980 | 0.910   | 35.65       | 11.585 |

Note1: PWKL= posterior-weighted Kullback-Leibler method; SHTVOR = Sympton–Hetter method, which comprises test overlap control, variable length, online update, and restricted maximum information; DBS= dynamic binary searching.

Note2: This is a variable-length CD-CAT for the DINA model. Item bank and examinees were simulated in the same way as Study I and other were the same as in Study II except that the target test overlap rate  $\bar{T}_{\max}$  for SHTVOR was set to be 0.06.

Table 3

Item Exposure and Item Bank Use for the NC\_RUM Model (Variable-length)

| Stopping criteria | Item selection | Test overlap | Overused (>0.2) | Underused (<0.02) |
|-------------------|----------------|--------------|-----------------|-------------------|
| 0.7               | PWKL           | 0.757        | 8               | 434               |
|                   | SHTVOR         | 0.061        | 0               | 34                |
|                   | DBS            | 0.045        | 0               | 0                 |
| 0.8               | PWKL           | 0.754        | 10              | 425               |
|                   | SHTVOR         | 0.075        | 0               | 25                |
|                   | DBS            | 0.055        | 0               | 0                 |
| 0.9               | PWKL           | 0.740        | 14              | 418               |
|                   | SHTVOR         | 0.081        | 0               | 18                |
|                   | DBS            | 0.075        | 0               | 0                 |

Note1: PWKL=posterior-weighted Kullback-Leibler index; SHTVOR = the Sympon-Hetter method, which comprises test overlap control, variable length, online update, and restricted maximum information; DBS= dynamic binary searching strategy.
